# Supplementary material for: Divergence and Convergence in Enzyme Evolution
Source: PubMed Central journal article supplement — J Biol Chem. 2011 Nov 8;287(1):21–8. doi: 10.1074/jbc.R111.241976 (PMC3249071; doi:10.1074/jbc.r111.241976), 2011-11-08
Supplement: supp_R111.241976_jbc.R111.241976-1.pdf [file supp_R111.241976_jbc.R111.241976-1.pdf]

**Table S1. Common features of the proteins from several structural superfamilies**

(Supplementary material to the review by M.Y. Galperin and E.V. Koonin “Divergence and convergence in enzyme evolution”, submitted for publication in the *Journal of Biological Chemistry*, 2011)

| Superfamily name                     | Member enzymes (PDB code and/or EC number, where available)                                                                                                                                                                                                                                                                                                                                                                                                                                                                                                                                                                                                                                                                                                                                                                                                                                                                                                                                                                                                                                                                                                                                                                                                                                                                                                                                                                                                                                                                                                                                                                                                                                                                                                                                                                                                                                                                                                                                                                                                                                                                                                                                                                                                                           | Common traits of the superfamily members                                                                                                                                                                                                                                                                                                                                                                                                                                                                                                                | References                                                                                                                                                                                                                   |
|--------------------------------------|---------------------------------------------------------------------------------------------------------------------------------------------------------------------------------------------------------------------------------------------------------------------------------------------------------------------------------------------------------------------------------------------------------------------------------------------------------------------------------------------------------------------------------------------------------------------------------------------------------------------------------------------------------------------------------------------------------------------------------------------------------------------------------------------------------------------------------------------------------------------------------------------------------------------------------------------------------------------------------------------------------------------------------------------------------------------------------------------------------------------------------------------------------------------------------------------------------------------------------------------------------------------------------------------------------------------------------------------------------------------------------------------------------------------------------------------------------------------------------------------------------------------------------------------------------------------------------------------------------------------------------------------------------------------------------------------------------------------------------------------------------------------------------------------------------------------------------------------------------------------------------------------------------------------------------------------------------------------------------------------------------------------------------------------------------------------------------------------------------------------------------------------------------------------------------------------------------------------------------------------------------------------------------------|---------------------------------------------------------------------------------------------------------------------------------------------------------------------------------------------------------------------------------------------------------------------------------------------------------------------------------------------------------------------------------------------------------------------------------------------------------------------------------------------------------------------------------------------------------|------------------------------------------------------------------------------------------------------------------------------------------------------------------------------------------------------------------------------|
| <a href="#">ATP-grasp</a>            | <p>Glutathione synthetase (<a href="#">1gsh</a>, <a href="#">2hgs</a>, EC <a href="#">6.3.2.3</a>), D-ala-D-ala ligase (<a href="#">1ioy</a>, EC <a href="#">6.3.2.4</a>), D-ala-D-lactate ligase (<a href="#">1e4e</a>, EC <a href="#">6.1.2.1</a>), biotin carboxylase (<a href="#">1dv1</a>, EC <a href="#">6.3.4.14</a>), carbamoyl phosphate synthase (<a href="#">1jdb</a>, EC <a href="#">6.3.5.5</a>), pyruvate phosphate dikinase (<a href="#">1dik</a>, EC <a href="#">2.7.9.1</a>), phosphoribosyl-amine-glycine ligase PurD (<a href="#">1gso</a>, EC <a href="#">6.3.4.13</a>), phosphoribosyl glycinamide formyltransferase PurT (<a href="#">1eyz</a>, EC <a href="#">2.1.2.-</a>), N<sup>5</sup>-carboxyaminoimidazole ribonucleotide synthase PurK (<a href="#">1b6s</a>, EC <a href="#">6.3.4.18</a>), 5-formaminoimidazole-4-carboxamide ribonucleotide synthase PurP (<a href="#">2r7k</a>, EC <a href="#">6.3.4.-</a>), tubulin-tyrosine ligase (EC <a href="#">6.3.2.25</a>), tubulin glycyase (EC <a href="#">6.3.2.-</a>), tubulin polyglutamylase, ribosomal protein S6-glutamate ligase RimK, succinate-CoA ligase (<a href="#">1jki</a>, EC <a href="#">6.2.1.5</a>), ATP-citrate synthase (<a href="#">3mwd</a>, EC <a href="#">2.3.3.8</a>), malate-CoA ligase (EC <a href="#">6.2.1.9</a>), synapsin (<a href="#">1aux</a>), <math>\alpha</math>-aminoadipate-LysW ligase LysX (<a href="#">1uc9</a>, EC <a href="#">6.3.2.n4</a>), glutathionylspermidine synthetase GspS, (<a href="#">2io9</a>, EC <a href="#">6.3.1.8</a>), D-aspartate ligase Asl<sub>fm</sub> (EC <a href="#">6.3.1.12</a>), carnosine synthase (EC <a href="#">6.3.2.11</a>), <math>\gamma</math>-F420-2:<math>\alpha</math>-L-glutamate ligase CofF (EC <a href="#">6.3.2.32</a>), tetrahydromethanopterin:<math>\alpha</math>-L-glutamate ligase MptN (EC <a href="#">6.3.2.33</a>), alanine-anticapsin ligase BacD/YwfE (EC <a href="#">6.3.2.28</a>), L-amino acid ligase (EC <a href="#">6.3.2.28</a>), N-acetylasparylglutamate synthase, <math>\beta</math>-citrylglutamate synthase, nikkomycin biosynthesis carboxylase SanS, inositol 1,3,4-trisphosphate 5/6-kinase (<a href="#">1z2n</a>, EC <a href="#">2.7.1.134</a>), mycosporine glycine synthetase Ava_3856</p> | <p>Conserved structural core (<math>\leq 4.3</math> Å C<math>\alpha</math> RMSD on <math>\geq 230</math> aa); common ATP-binding residues, which include two conserved Lys/Arg residues that bind <math>\alpha</math>- and <math>\beta</math>-phosphates of ATP, a Glx/Asp that interacts with adenine amino group and the N<sup>6</sup> atom, hydrophobic residues that bind the adenine ring, and three Glx/Asx residues that coordinate Mg<sup>2+</sup> ions; a common catalytic mechanism that includes formation of a phosphoacyl intermediate</p> | <ol style="list-style-type: none"> <li><a href="#">Superfamily descriptions;</a></li> <li><a href="#">Structures of the superfamily members;</a></li> <li><a href="#">Descriptions of new superfamily members</a></li> </ol> |
| <a href="#">Alkaline phosphatase</a> | <p>Alkaline phosphatase (<a href="#">1alk</a>, EC <a href="#">3.1.3.1</a>), phosphoglycerate mutase (<a href="#">1o98</a>, EC <a href="#">5.4.2.1</a>), phosphopentomutase (<a href="#">3ot9</a>, EC <a href="#">5.4.2.7</a>), acid phosphatase (<a href="#">2d1g</a>, EC <a href="#">3.1.3.2</a>), nucleotide pyrophosphatase/phosphodiesterase (<a href="#">2gso</a>, EC <a href="#">3.1.4.39</a>), arylsulfatase (<a href="#">1auk</a>, EC <a href="#">3.1.6.1</a>), N-acetylgalactosamine 4-sulfatase (<a href="#">1fsu</a>, EC <a href="#">3.1.6.12</a>), steryl-sulfatase (<a href="#">1p49</a>, EC <a href="#">3.1.6.2</a>), phosphonoacetate hydrolase (<a href="#">1ei6</a>, EC <a href="#">3.11.1.2</a>), phosphonopyruvate hydrolase (EC <a href="#">3.11.1.3</a>), phosphoglycerol transferase MdoB (EC <a href="#">2.7.8.20</a>), phosphonate monoester hydrolase/phosphodiesterase (<a href="#">2vqr</a>), archaeal phosphoglycerate mutase (<a href="#">3kd8</a>, EC <a href="#">5.4.2.1</a>), GPI phosphoethanolamine transferase PIG-N/Mcd4, LPS:phosphoethanolamine transferase EptB, polyglycerol phosphate lipoteichoic acid synthase LtaS (<a href="#">2w8d</a>, EC <a href="#">2.7.8.-</a>), pilin phospho-form transferase PptA, inorganic pyrophosphatase (EC <a href="#">3.6.1.1</a>)</p>                                                                                                                                                                                                                                                                                                                                                                                                                                                                                                                                                                                                                                                                                                                                                                                                                                                                                                                                                                    | <p>Conserved structural core (<math>\leq 3.6</math> Å C<math>\alpha</math> RMSD on <math>\geq 220</math> aa), conserved metal (Zn<sup>2+</sup>, Mn<sup>2+</sup>, or Mg<sup>2+</sup>)-binding His and Asp residues; common catalytic mechanism that includes phosphorylation (sulfatation) of the active-site Ser/Thr/fGly residue</p>                                                                                                                                                                                                                   | <ol style="list-style-type: none"> <li><a href="#">Superfamily descriptions;</a></li> <li><a href="#">Structures of the superfamily members;</a></li> <li><a href="#">Descriptions of new superfamily members</a></li> </ol> |

|                                    |                                                                                                                                                                                                                                                                                                                                                                                                                                                                                                                                                                                                                                                                                                                                                                                                                                                                                                                                                                                                                                                                                                                                                                                                                                                                                                                                                                                                                                                                                                                                                                                                                                                                                                                                                                                                                                                                                                                                                                                                                                                                                                                                   |                                                                                                                                                                                                                                                                                                                                                                                                                                                                               |                                                                                                                                                                                                                              |
|------------------------------------|-----------------------------------------------------------------------------------------------------------------------------------------------------------------------------------------------------------------------------------------------------------------------------------------------------------------------------------------------------------------------------------------------------------------------------------------------------------------------------------------------------------------------------------------------------------------------------------------------------------------------------------------------------------------------------------------------------------------------------------------------------------------------------------------------------------------------------------------------------------------------------------------------------------------------------------------------------------------------------------------------------------------------------------------------------------------------------------------------------------------------------------------------------------------------------------------------------------------------------------------------------------------------------------------------------------------------------------------------------------------------------------------------------------------------------------------------------------------------------------------------------------------------------------------------------------------------------------------------------------------------------------------------------------------------------------------------------------------------------------------------------------------------------------------------------------------------------------------------------------------------------------------------------------------------------------------------------------------------------------------------------------------------------------------------------------------------------------------------------------------------------------|-------------------------------------------------------------------------------------------------------------------------------------------------------------------------------------------------------------------------------------------------------------------------------------------------------------------------------------------------------------------------------------------------------------------------------------------------------------------------------|------------------------------------------------------------------------------------------------------------------------------------------------------------------------------------------------------------------------------|
| <b>Cupin</b>                       | <p>Oxalate oxidase (<a href="#">1fi2</a>, EC <a href="#">1.2.3.4</a>), oxalate decarboxylase (<a href="#">1uw8</a>, EC <a href="#">4.1.1.2</a>), gentisate 1,2-dioxygenase (<a href="#">2d40</a>, EC <a href="#">1.13.11.4</a>), homogentisate 1,2-dioxygenase (<a href="#">1ey2</a>, EC <a href="#">1.13.11.5</a>), 3-hydroxyanthranilate 3,4-dioxygenase (<a href="#">1yfu</a>, EC <a href="#">1.13.11.6</a>), cysteine dioxygenase (<a href="#">3eln</a>, EC <a href="#">1.13.11.20</a>), quercetin 2,3-dioxygenase (<a href="#">1juh</a>, EC <a href="#">1.13.11.24</a>), acetylaceton dioxygenase Dke1 (<a href="#">3bal</a>, EC <a href="#">1.13.11.50</a>), 1,2-dihydroxy-3-keto-5-methylthiopentene (acireductone) dioxygenase (<a href="#">1vr3</a>, EC <a href="#">1.13.11.-</a>), 1-hydroxy-2-naphthoate dioxygenase (EC <a href="#">1.13.11.38</a>), phosphomannose isomerase (<a href="#">1pmi</a>, EC <a href="#">5.3.1.8</a>), glucose-6-phosphate isomerase (<a href="#">1qy4</a>, EC <a href="#">5.3.1.9</a>), dTDP-4-dehydrorhamnose 3,5-epimerase RmlC (<a href="#">1dzt</a>, EC <a href="#">5.1.3.13</a>), lyxose isomerase (<a href="#">3mpb</a>, EC <a href="#">5.3.1.15</a>), 5-keto-4-deoxyuronate isomerase Kdul (<a href="#">1xru</a>, <a href="#">5.3.1.17</a>), dTDP-4-keto-6-deoxy-glucose-5-epimerase EvaD (<a href="#">1oi6</a>), dTDP-6-deoxy-3,4-keto-hexulose isomerase FdtA (<a href="#">2pa7</a>), ectoine synthase EctC (EC <a href="#">4.2.1.108</a>), ureidoglycolate hydrolase AIIA (<a href="#">1yqc</a>, EC <a href="#">3.5.3.19</a>), hydroxypropylphosphonic acid epoxidase (<a href="#">2bnm</a>), dimethylsulfoniopropionate lyase DddL (EC <a href="#">4.4.1.3</a>), phaseolin (<a href="#">2phl</a>), canavalin (<a href="#">2cau</a>), pirin (<a href="#">1j1l</a>), auxin-binding protein (<a href="#">1lrh</a>), ethanolamine utilization protein EutQ (<a href="#">2pyt</a>), polyketide cyclase RemF (<a href="#">3ht1</a>), bacilysin biosynthesis protein BacB (<a href="#">3h7j</a>), cuproprotein CuaA (<a href="#">2xla</a>), vitamin K-dependent gamma-carboxylase</p> | <p>Conserved structural core (&lt;4.6 Å Cα RMSD on &gt;99 aa), partly conserved metal (Mn<sup>2+</sup>, Fe<sup>2+</sup>, Cu<sup>2+</sup>, Ni<sup>2+</sup>, or Zn<sup>2+</sup>)-binding His residues that often form Gx<sub>5</sub>HxHx<sub>3,4</sub>Ex<sub>6</sub>G and GDx<sub>4</sub>PxGx<sub>2</sub>Hx<sub>3</sub>N motifs; common catalytic mechanism includes binding of dioxygen to the metal atom and the substrate with the formation of a peroxidic intermediate</p> | <ol style="list-style-type: none"> <li><a href="#">Superfamily descriptions;</a></li> <li><a href="#">Structures of the superfamily members;</a></li> <li><a href="#">Descriptions of new superfamily members</a></li> </ol> |
| <b>HD-domain phosphohydrolases</b> | <p>3',5'-cAMP/cGMP phosphodiesterase (<a href="#">2hd1</a>, EC <a href="#">3.1.4.17</a>), ppGpp hydrolase (<a href="#">1vj7</a>, EC <a href="#">3.1.7.2</a>), exopolyphosphatase (<a href="#">1u6z</a>, EC <a href="#">3.6.1.11</a>), dNMP 5'-nucleotidase YfbR (<a href="#">2par</a>, EC <a href="#">3.1.3.5</a>), dNTP triphosphohydrolase (<a href="#">2dqb</a>, EC <a href="#">3.1.5.-</a>), dGTPase (<a href="#">3bg2</a>, EC <a href="#">3.1.5.1</a>), cyanamide hydratase (EC <a href="#">4.2.1.69</a>), 2',3'-cAMP/cGMP hydrolase (EC <a href="#">3.1.4.16</a>), 3'-5' exoribonuclease YhaM, c-di-GMP phosphodiesterase (EC <a href="#">3.1.4.52</a>), 7,8-dihydro-D-neopterin 2',3'-cyclic phosphate phosphodiesterase, uridylyl-removing enzyme GlnD, myo-inositol oxygenase MioX (<a href="#">2huo</a>, EC <a href="#">1.13.99.1</a>)</p>                                                                                                                                                                                                                                                                                                                                                                                                                                                                                                                                                                                                                                                                                                                                                                                                                                                                                                                                                                                                                                                                                                                                                                                                                                                                              | <p>Conserved structural core (&lt;3.6 Å Cα RMSD on &gt;105 aa), conserved metal (Mn<sup>2+</sup>, Mg<sup>2+</sup>, Co<sup>2+</sup>, or Fe<sup>2+</sup>)-binding His and Asp residues organized into the Hx<sub>20-50</sub>HDx<sub>60-140</sub>D motif</p>                                                                                                                                                                                                                     | <ol style="list-style-type: none"> <li><a href="#">Superfamily description;</a></li> <li><a href="#">Descriptions of the superfamily members</a></li> </ol>                                                                  |
| <b>Ntn-hydrolases</b>              | <p>Penicillin acylase (<a href="#">1pnl</a>, EC <a href="#">3.5.1.11</a>), glutamine 5-phosphoribosyl-1-pyrophosphate amidotransferase (<a href="#">1ecc</a>, EC <a href="#">2.4.2.14</a>), proteasome subunit (<a href="#">1pma</a>, EC <a href="#">3.4.99.46</a>), glucosamine 6-phosphate synthase (<a href="#">1xff</a>, EC <a href="#">2.6.1.16</a>), protease HslV (<a href="#">1m4y</a>, EC <a href="#">3.4.25.-</a>), aspartylglucosaminidase (<a href="#">1apy</a>, EC <a href="#">3.5.1.26</a>), γ-glutamyltranspeptidase (<a href="#">2dg5</a>, EC <a href="#">2.3.2.2</a>), asparagine synthetase (<a href="#">1ct9</a>, EC <a href="#">6.3.5.4</a>), β-lactam synthetase (<a href="#">1jgt</a>, EC <a href="#">6.3.3.4</a>), glutamate synthase (<a href="#">1ea0</a>, EC <a href="#">1.4.1.13</a>), L-asparaginase (<a href="#">2gez</a>, EC <a href="#">3.5.1.1</a>), threonine aspartase (<a href="#">2a8i</a>, EC <a href="#">3.4.25.-</a>), acyl-CoA: isopenicillin N acyltransferase (<a href="#">2x1c</a>, EC <a href="#">2.3.1.164</a>), bile salt hydrolase (<a href="#">2hez</a>, EC <a href="#">3.5.1.24</a>), N-acyl homoserine lactone acylase PvdQ (<a href="#">2wyb</a>, EC <a href="#">3.5.1.97</a>), acid ceramidase (EC <a href="#">3.5.1.23</a>), <i>IMP cyclohydrolase PuroO</i> (<a href="#">2ntk</a>, EC <a href="#">3.5.4.10</a>)</p>                                                                                                                                                                                                                                                                                                                                                                                                                                                                                                                                                                                                                                                                                                                                                         | <p>Common structural core (&lt;4.1 Å Cα RMSD on &gt;96 aa) decorated with a variety of structural elements; sequence conservation is limited to the N-terminal β-hairpin that contains the catalytic Ser, Cys or Thr residue</p>                                                                                                                                                                                                                                              | <ol style="list-style-type: none"> <li><a href="#">Superfamily descriptions;</a></li> <li><a href="#">Structures of the superfamily members;</a></li> <li><a href="#">Descriptions of new superfamily members</a></li> </ol> |

Root mean square deviation (RMSD) values of Cα traces were taken from [Dali](#) and [MMDB](#) databases
